# Supplementary material for: Using small angle neutron scattering to explore porosity, connectivity and accessibility, towards optimised hierarchical solid acid catalysts
Source: Royal Society of Chemistry journal article supplement (doi:10.1039/d3ta04763f), 2023-01-01
Supplement: d3ta04763f1.pdf [file d3ta04763f1.pdf]

## SUPPLEMENTARY INFORMATION

### Using small angle neutron scattering to explore porosity, connectivity and accessibility, towards optimised hierarchical solid acid catalysts

Matthew E. Potter,<sup>a\*</sup> Alice E. Oakley,<sup>a</sup> Joshua J. M. Le Brocq,<sup>a</sup> Marina Carravetta,<sup>a</sup> Lauren N. Riley,<sup>a</sup> Stephen M. King,<sup>b</sup> Cara M. Doherty,<sup>c</sup> Bart D. Vandegehuchte<sup>d</sup> and Robert Raja<sup>a\*</sup>

a) University of Southampton, Chemistry Department, Southampton, Hants, SO17 1BJ, UK. E-mail: M.E.Potter@soton.ac.uk, R.Raja@soton.ac.uk

b) ISIS Neutron and Muon Source, STFC Rutherford Appleton Laboratory, Harwell Campus, Didcot, Oxon, OX11 0QX, UK.

c) CSIRO Manufacturing, Private Bag 10, Clayton South, Victoria, Australia

d) TotalEnergies OneTech Belgium, Zone Industrielle Feluy C, B-7181 Seneffe, Belgium.

### Contents

|                                                                          |    |
|--------------------------------------------------------------------------|----|
| Physicochemical and textural characterisation .....                      | 2  |
| Powder XRD .....                                                         | 2  |
| ICP .....                                                                | 2  |
| SEM images .....                                                         | 2  |
| Solid State NMR.....                                                     | 4  |
| NH <sub>3</sub> -TPD data.....                                           | 5  |
| n-Butane isomerisation catalysis data .....                              | 5  |
| Ethanol dehydration catalysis data .....                                 | 7  |
| Small angle neutron scattering model fitting for MP-SAPO-5 .....         | 7  |
| Small angle neutron scattering model fitting for HP-SAPO-5 systems ..... | 10 |
| 2 Gaussians, Power Law and Fractal.....                                  | 10 |
| 4 Gaussians, Power Law and Fractal.....                                  | 13 |
| 4 Gaussians, Power Law, Fractal and Sphere.....                          | 16 |
| 4 Gaussians, Power Law, Fractal and Core-Shell Sphere .....              | 19 |
| Descriptions of Model Terms .....                                        | 25 |

## Physicochemical and textural characterisation

### Powder XRD

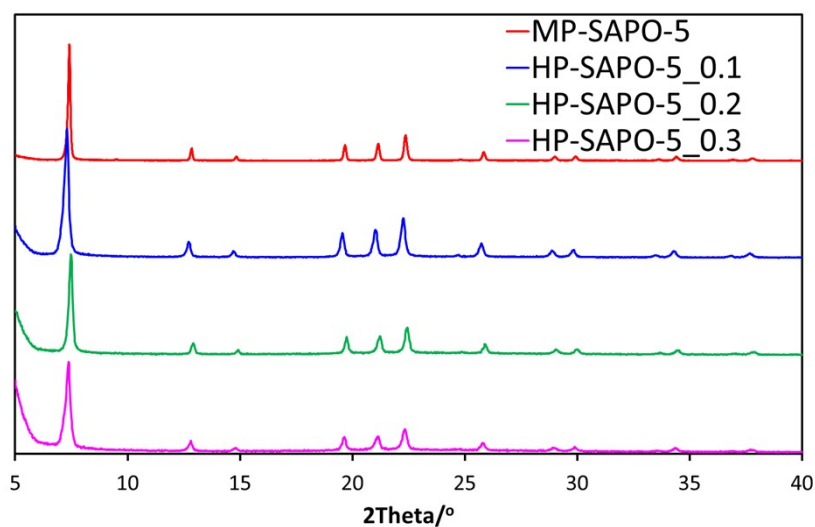

**Figure S1:** Powder X-ray diffraction pattern of the four SAPO-5 species, confirming phase pure AlPO-5 has been formed.

### ICP

**Table S1:** ICP analysis of microporous and hierarchical SAPO-5.

| System        | Al (wt%) | P (wt%) | Si (wt%) | (mol P + mol Si) / mol Al |
|---------------|----------|---------|----------|---------------------------|
| MP-SAPO-5     | 21.9     | 24.1    | 1.4      | 1.02                      |
| HP-SAPO-5_0.1 | 16.1     | 17.8    | 6.1      | 1.33                      |
| HP-SAPO-5_0.2 | 19.5     | 15.5    | 9.8      | 1.18                      |
| HP-SAPO-5_0.3 | 19.9     | 15.0    | 11.2     | 1.20                      |

### SEM images

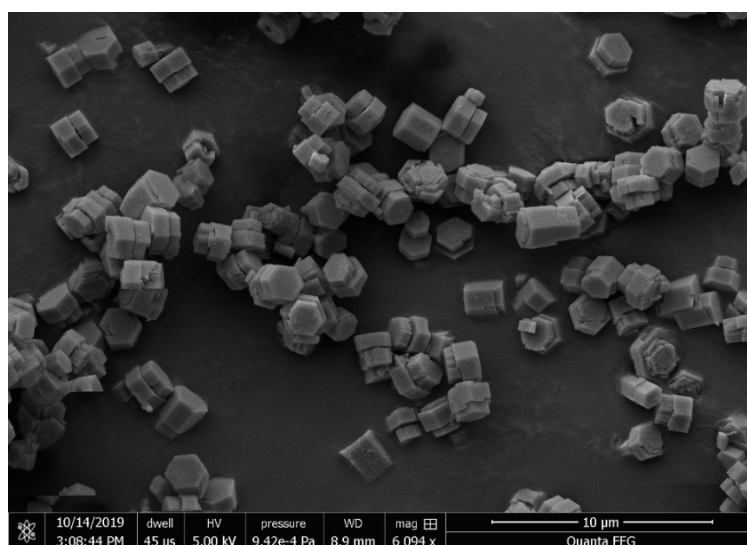

**Figure S2:** SEM image showing the crystalline nature of MP-SAPO-5.

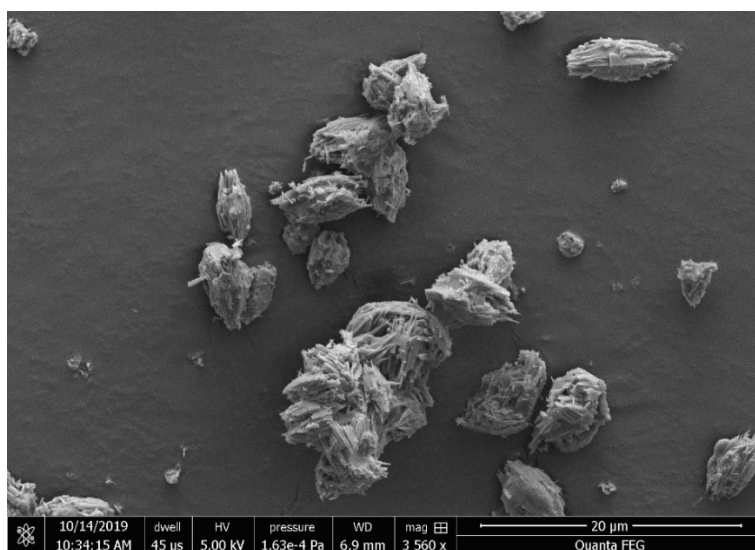

**Figure S3:** SEM image showing the rough non-uniform surface of HP-SAPO-5\_0.1.

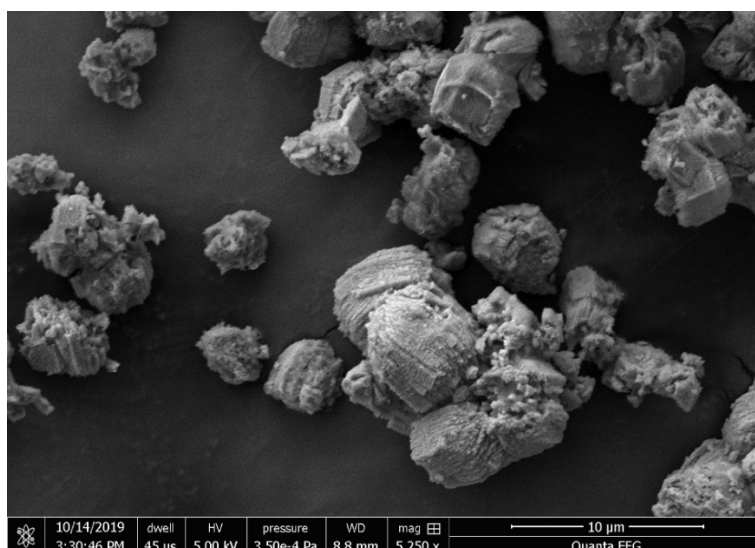

**Figure S4:** SEM image showing the rough non-uniform surface of HP-SAPO-5\_0.2.

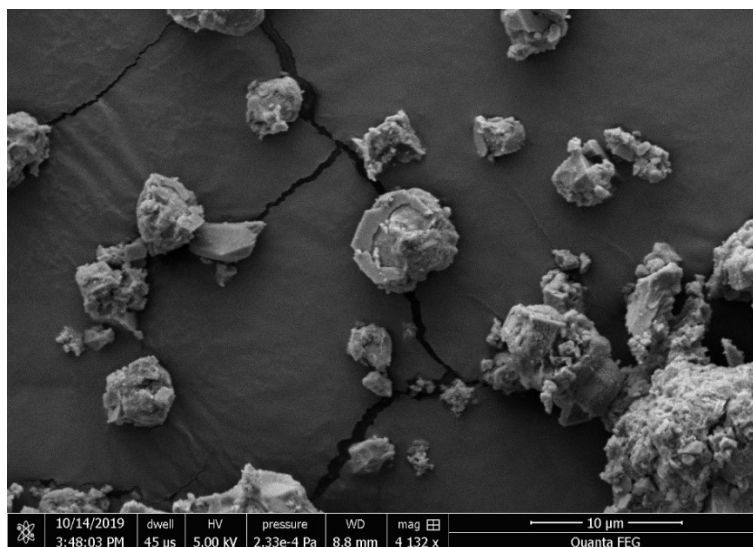

**Figure S5:** SEM image showing the rough non-uniform particles of HP-SAPO-5\_0.3.

### Solid State NMR

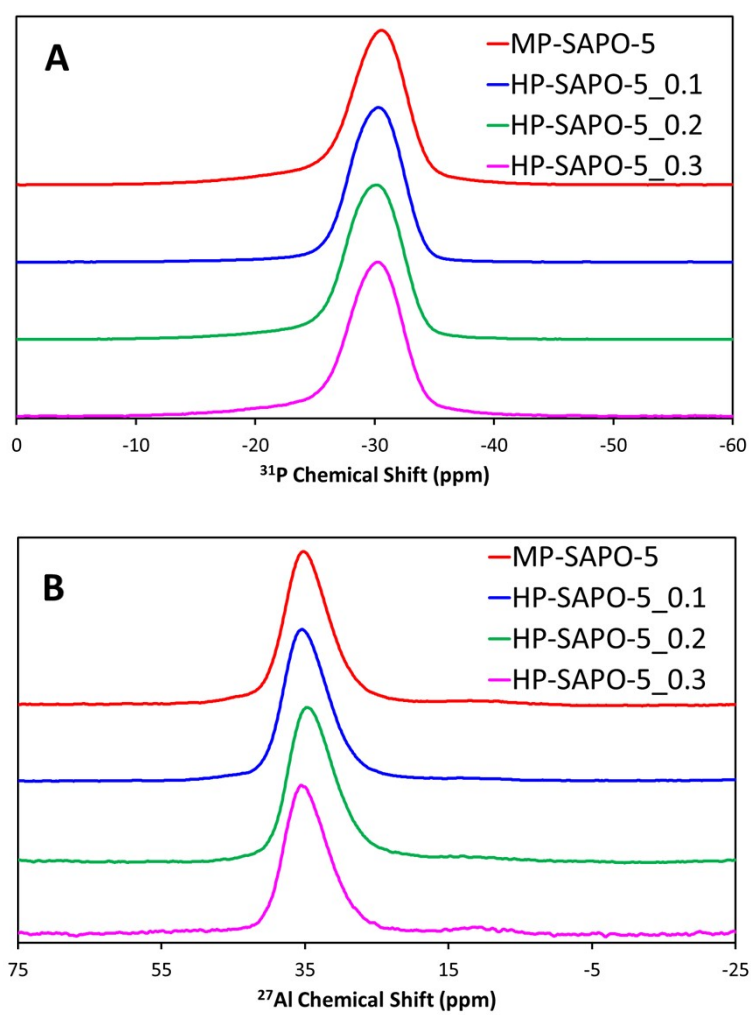

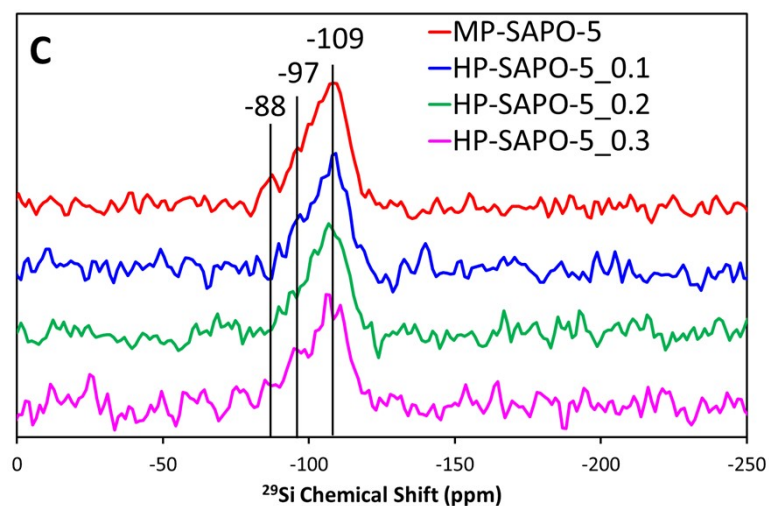

**Figure S6:** Showing 1D solid state NMR data of the four SAPO-5 samples, focussing on the  $^{31}\text{P}$  (A),  $^{27}\text{Al}$  (B) and  $^{29}\text{Si}$  (C) nuclei. Further details can be found in the main text in the experimental methods.

#### $\text{NH}_3$ -TPD data

**Table S2:** Summary of the  $\text{NH}_3$ -TPD data characterising acid site quantity.

| Sample        | Chemisorbed $\text{NH}_3$ ( $\mu\text{mol}/\text{g}_{\text{sample}}$ ) | Desorption Maxima ( $^{\circ}\text{C}$ ) |
|---------------|------------------------------------------------------------------------|------------------------------------------|
| MP-SAPO-5     | 188                                                                    | 375                                      |
| HP-SAPO-5_0.1 | 258                                                                    | 389                                      |
| HP-SAPO-5_0.2 | 326                                                                    | 384                                      |
| HP-SAPO-5_0.3 | 245                                                                    | 369                                      |

#### n-Butane isomerisation catalysis data

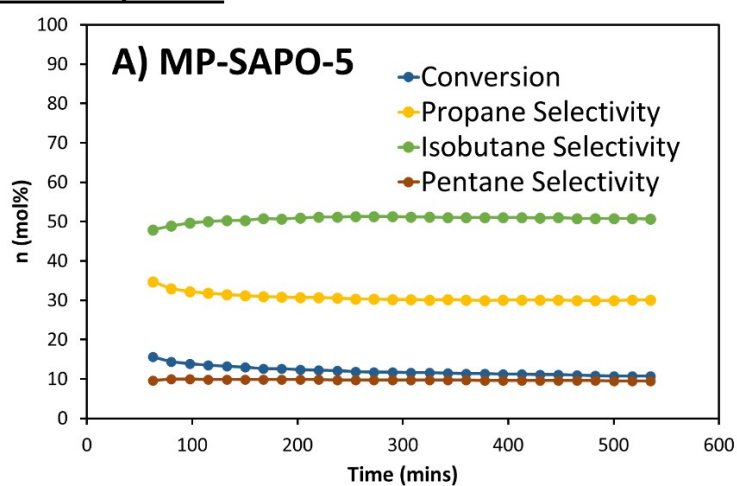

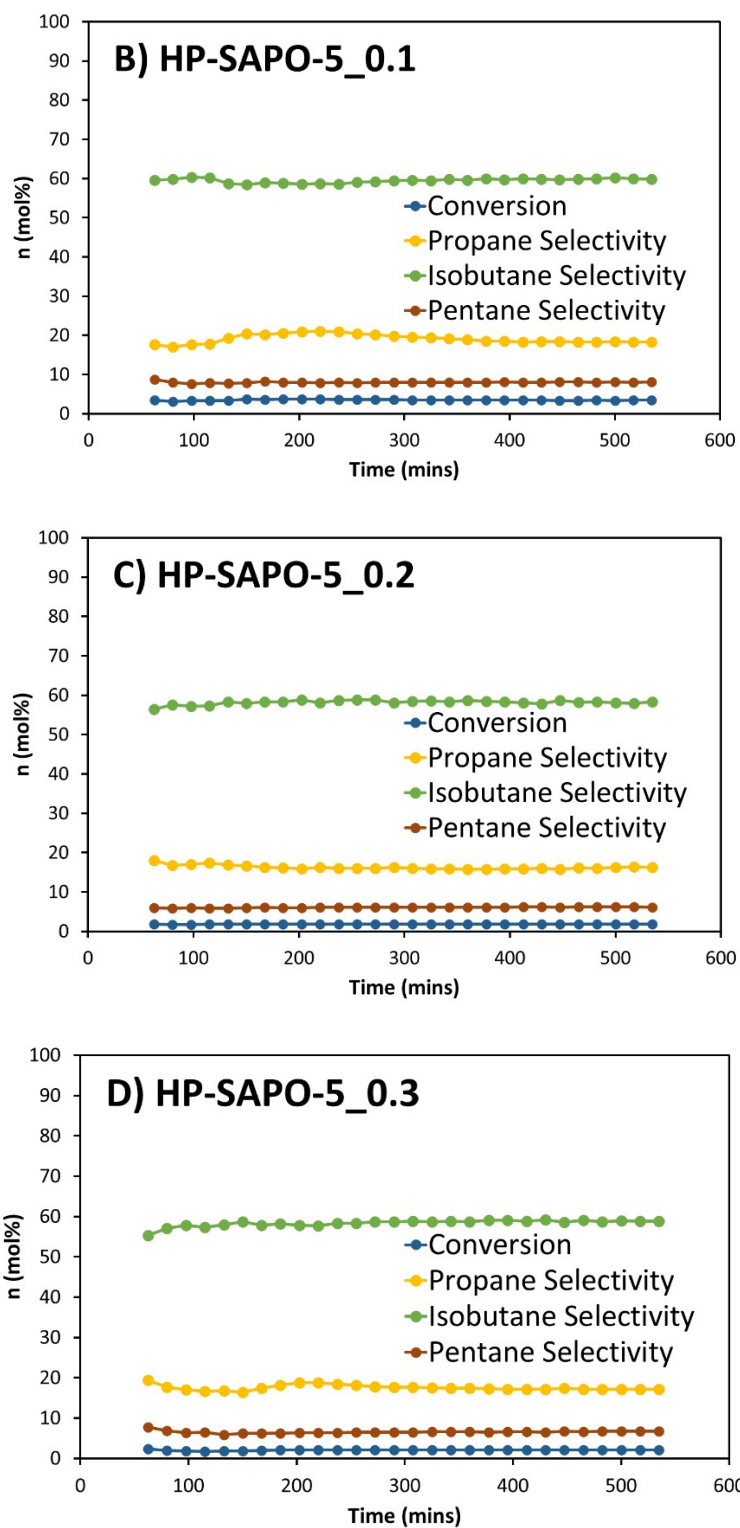

**Figure S7:** On-stream catalytic data showing the activity of the four SAPO-5 systems (A-D) for the n-butane isomerisation reaction. Reaction conditions: 5 ml/min flow of 10% n-butane in nitrogen at 300 °C, 0.3 g of catalyst.

### Ethanol dehydration catalysis data

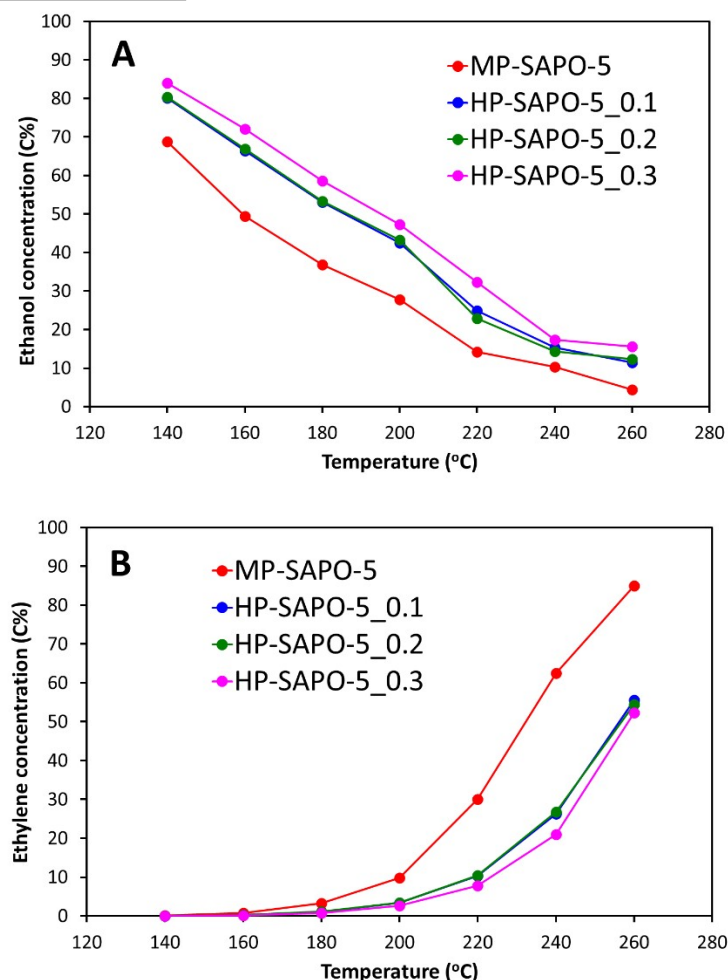

**Figure S8:** Showing the ethanol dehydration data with the C% of Ethanol (A) and Ethylene (B) in the output stream. Reaction conditions: 25 mL/min  $N_2$  carrier gas, 0.3 g of catalyst, 10  $\mu$ L/min flow of 10 vol% heptane in ethanol.

### Small angle neutron scattering model fitting for MP-SAPO-5

**Table S3:** Full fitting parameters and values, with associated uncertainties, achieved with different models on MP-SAPO-5, towards optimal fitting.

| Parameter                                      | 2G+P <sup>a</sup>                 | 2G+F <sup>b</sup>     | 2G+F PD <sup>c</sup>  | 2G+P+F <sup>d</sup>               | 2G+P+F PD <sup>e</sup>            |
|------------------------------------------------|-----------------------------------|-----------------------|-----------------------|-----------------------------------|-----------------------------------|
| Goodness of fit                                |                                   |                       |                       |                                   |                                   |
| Reduced $\chi^2$                               | 407.6                             | 190.1                 | 123.5                 | 6.912                             | 4.724                             |
| General parameters                             |                                   |                       |                       |                                   |                                   |
| Overall Scale (Fixed)                          | 1                                 | 1                     | 1                     | 1                                 | 1                                 |
| Background, $cm^{-1}$                          | 0.021<br>$\pm 1.5 \times 10^{-4}$ | -0.074<br>$\pm 0.044$ | -0.114<br>$\pm 0.064$ | 0.016<br>$\pm 1.7 \times 10^{-4}$ | 0.016<br>$\pm 1.8 \times 10^{-4}$ |
| 1 <sup>st</sup> Gaussian peak, Bragg peak, 100 |                                   |                       |                       |                                   |                                   |
| Scale, <b>A</b>                                | 0.146                             | 0.144                 | 0.153                 | 0.143                             | 0.142                             |

|                                                   |                                                      |                                   |                                   |                                                      |                                                      |
|---------------------------------------------------|------------------------------------------------------|-----------------------------------|-----------------------------------|------------------------------------------------------|------------------------------------------------------|
| (> 0)                                             | $\pm 0.001$                                          | $\pm 0.001$                       | $\pm 0.001$                       | $\pm 0.001$                                          | $\pm 0.001$                                          |
| Position, $\text{\AA}^{-1}$<br>(0.50 to 0.55)     | 0.524<br>$\pm 1.5 \times 10^{-4}$                    | 0.522<br>$\pm 0.002$              | 0.523<br>$\pm 1.5 \times 10^{-4}$ | 0.524<br>$\pm 1.6 \times 10^{-4}$                    | 0.524<br>$\pm 1.6 \times 10^{-4}$                    |
| Width <sup>f</sup> , $\text{\AA}^{-1}$            | 0.021<br>$\pm 1.9 \times 10^{-4}$                    | 0.026<br>$\pm 2.1 \times 10^{-4}$ | 0.023<br>$\pm 1.9 \times 10^{-4}$ | 0.023<br>$\pm 1.9 \times 10^{-4}$                    | 0.023<br>$\pm 1.9 \times 10^{-4}$                    |
| 2 <sup>nd</sup> Gaussian peak, Bragg peak, 110    |                                                      |                                   |                                   |                                                      |                                                      |
| Scale, <b>B</b><br>(> 0)                          | 0.037<br>$\pm 0.020$                                 | 0.096<br>$\pm 0.043$              | 0.137<br>$\pm 0.064$              | 0.011<br>$\pm 0.001$                                 | 0.010<br>$\pm 0.001$                                 |
| Position, $\text{\AA}^{-1}$<br>(0.90 to 0.95)     | 0.905<br>$\pm 0.003$                                 | 0.900<br>$\pm 0.008$              | 0.900<br>$\pm 0.009$              | 0.910<br>$\pm 0.004$                                 | 0.911<br>$\pm 0.005$                                 |
| Width <sup>f</sup> , $\text{\AA}^{-1}$            | 0.003<br>$\pm 0.001$                                 | 0.709<br>$\pm 0.188$              | 0.908<br>$\pm 0.238$              | 0.028<br>$\pm 0.005$                                 | 0.032<br>$\pm 0.005$                                 |
| Power Law                                         |                                                      |                                   |                                   |                                                      |                                                      |
| Scale, <b>C</b><br>(> 0)                          | $4.995 \times 10^{-5}$<br>$\pm 2.935 \times 10^{-7}$ | -                                 | -                                 | $1.067 \times 10^{-6}$<br>$\pm 1.652 \times 10^{-9}$ | $1.057 \times 10^{-6}$<br>$\pm 1.893 \times 10^{-9}$ |
| Power<br>(3 to 4)                                 | 3.189<br>$\pm 0.001$                                 | -                                 | -                                 | 4.000<br>$\pm 5.8 \times 10^{-9}$                    | 4.000<br>$\pm 5.9 \times 10^{-9}$                    |
| Fractal                                           |                                                      |                                   |                                   |                                                      |                                                      |
| Scale, <b>D</b><br>(0 to 1)                       | -                                                    | 0.024<br>$\pm 0.001$              | 0.021<br>$\pm 0.001$              | 0.005<br>$\pm 2.1 \times 10^{-5}$                    | 0.005<br>$\pm 5.0 \times 10^{-5}$                    |
| Radius, $\text{\AA}$                              | -                                                    | 10.003<br>$\pm 0.062$             | 4.680<br>$\pm 0.386$              | 21.561<br>$\pm 0.109$                                | 14.437<br>$\pm 0.507$                                |
| Fractal dimension<br>(2 to 3)                     | -                                                    | 2.896<br>$\pm 0.003$              | 2.906<br>$\pm 0.001$              | 2.676<br>$\pm 0.010$                                 | 2.542<br>$\pm 0.013$                                 |
| Correlation length, $\text{\AA}$                  | -                                                    | 1080.6<br>$\pm 63.3$              | 817.0<br>$\pm 17.0$               | 52.9<br>$\pm 0.8$                                    | 61.8<br>$\pm 1.3$                                    |
| SLD Block, $10^{-6} \text{\AA}^{-2}$<br>(Fixed)   | -                                                    | 0                                 | 0                                 | 0                                                    | 0                                                    |
| SLD Solvent, $10^{-6} \text{\AA}^{-2}$<br>(Fixed) | -                                                    | 4.1                               | 4.1                               | 4.1                                                  | 4.1                                                  |
| Radius Polydispersity <sup>g</sup><br>(0 to 1)    | -                                                    | -                                 | 0.521<br>$\pm 0.029$              | -                                                    | 0.300<br>$\pm 0.013$                                 |

a) 2G+P = 2Gaussian Peaks and a Power Law;  $\text{Intensity}_{2G+P} = \text{Background} + A \cdot \text{Intensity}_{\text{Gaussian1}} + B \cdot \text{Intensity}_{\text{Gaussian2}} + C \cdot \text{Intensity}_{\text{PowerLaw}}$ . A-D here (and in all equations associated with this table) are scalar quantities that are proportional to the volume fraction of that component in the model. Only the intensity terms are functions of Q. Links to the individual models are found at the end of the ESI.

b) 2G+F = 2Gaussian Peaks and a Fractal, with no polydispersity;  $\text{Intensity}_{2G+F} = \text{Background} + A \cdot \text{Intensity}_{\text{Gaussian1}} + B \cdot \text{Intensity}_{\text{Gaussian2}} + D \cdot \text{Intensity}_{\text{Fractal}}$ .

c) 2G+F PD = 2Gaussian Peaks and a Fractal, with polydispersity;  $\text{Intensity}_{2G+F \text{ PD}} = \text{Background} + A \cdot \text{Intensity}_{\text{Gaussian1}} + B \cdot \text{Intensity}_{\text{Gaussian2}} + D \cdot \text{Intensity}_{\text{Fractal+PD}}$ .

d) 2G+P+F = 2Gaussian Peaks, a Power Law and a Fractal, with no polydispersity;  $\text{Intensity}_{2G+P+F} = \text{Background} + A \cdot \text{Intensity}_{\text{Gaussian1}} + B \cdot \text{Intensity}_{\text{Gaussian2}} + C \cdot \text{Intensity}_{\text{PowerLaw}} + D \cdot \text{Intensity}_{\text{Fractal}}$ .

e) 2G+P+F PD = 2Gaussian peaks, a Power Law and a Fractal with polydispersity;  $\text{Intensity}_{2G+P+F \text{ PD}} = \text{Background} + A \cdot \text{Intensity}_{\text{Gaussian1}} + B \cdot \text{Intensity}_{\text{Gaussian2}} + C \cdot \text{Intensity}_{\text{PowerLaw}} + D \cdot \text{Intensity}_{\text{Fractal+PD}}$ .

f) One standard deviation = FWHM/2.354.

g) HWHM of Lognormal distribution at the median radius divided by the median radius.



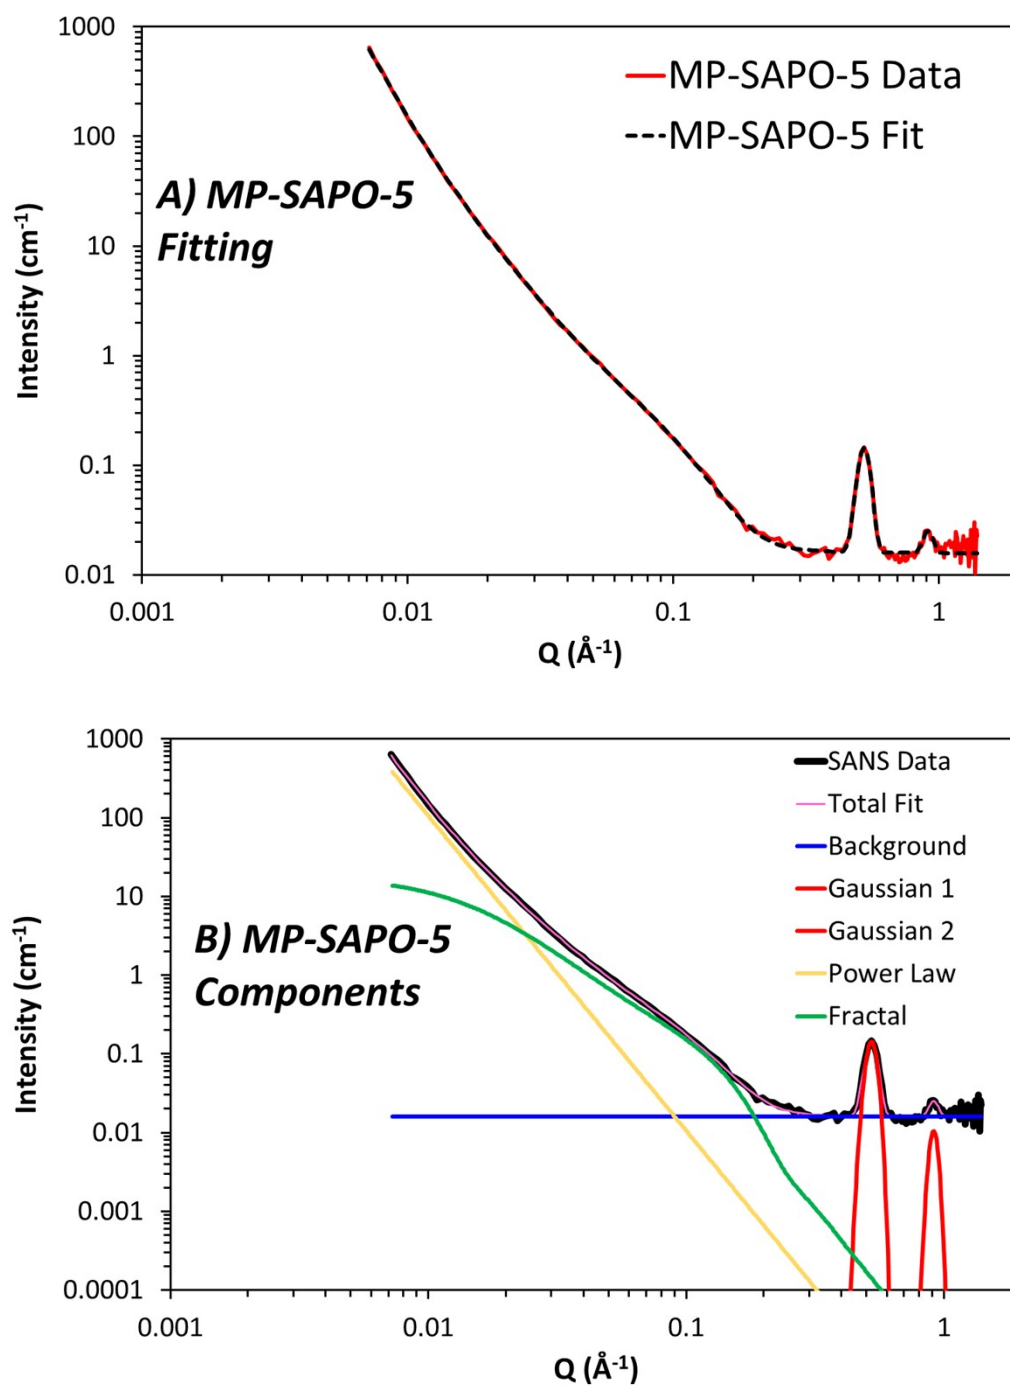

**Figure S9:** A) MP-SAPO-5 SANS data fitted with a 2 Gaussian peak, Power Law and Fractal aggregate (with Polydispersity) model, and B) Showing the individual contributions to the fit.

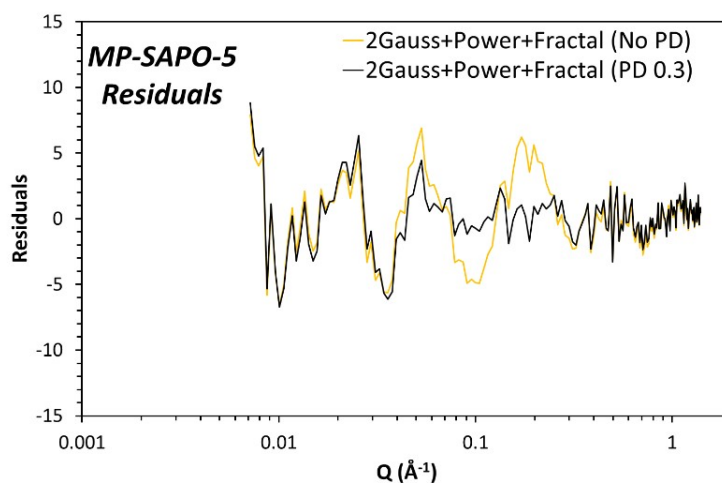

**Figure S10:** Residual plots after fitting the MP-SAPO-5 system with 2 Gaussian peak, Power Law and Fractal aggregate model, with and without radius polydispersity on the fractal pore size.

#### Small angle neutron scattering model fitting for HP-SAPO-5 systems

##### **2 Gaussians, Power Law and Fractal**

**Table S4:** Full fitting parameters and values, with associated uncertainties, achieved with a model including 2 Gaussians, Power Law and Fractal for the three HP-SAPO-5 systems.

| Parameter                                      | HP-SAPO-5_0.1                     | HP-SAPO-5_0.2                     | HP-SAPO-5_0.3                     |
|------------------------------------------------|-----------------------------------|-----------------------------------|-----------------------------------|
| Goodness of fit                                |                                   |                                   |                                   |
| Reduced $\chi^2$                               | 140.8                             | 158.7                             | 175.6                             |
| General parameters                             |                                   |                                   |                                   |
| Overall Scale (Fixed)                          | 1                                 | 1                                 | 1                                 |
| Background, $\text{cm}^{-1}$                   | 0.019<br>$\pm 1.8 \times 10^{-4}$ | 0.023<br>$\pm 1.8 \times 10^{-4}$ | 0.025<br>$\pm 1.7 \times 10^{-4}$ |
| 1 <sup>st</sup> Gaussian peak, Bragg peak, 100 |                                   |                                   |                                   |
| Scale, <b>A</b><br>( $> 0$ )                   | 0.087<br>$\pm 0.001$              | 0.077<br>$\pm 0.001$              | 0.067<br>$\pm 0.001$              |
| Position, $\text{\AA}^{-1}$<br>(0.50 to 0.55)  | 0.523<br>$\pm 2.5 \times 10^{-4}$ | 0.523<br>$\pm 2.9 \times 10^{-4}$ | 0.524<br>$\pm 3.2 \times 10^{-4}$ |
| Width <sup>a</sup> , $\text{\AA}^{-1}$         | 0.023<br>$\pm 2.9 \times 10^{-4}$ | 0.022<br>$\pm 3.4 \times 10^{-4}$ | 0.022<br>$\pm 3.7 \times 10^{-4}$ |
| 2 <sup>nd</sup> Gaussian peak, Bragg peak, 110 |                                   |                                   |                                   |
| Scale, <b>B</b><br>( $> 0$ )                   | 0.0047<br>$\pm 0.003$             | 0.005<br>$\pm 1.721$              | 0.001<br>$\pm 43598000$           |
| Position, $\text{\AA}^{-1}$<br>(0.90 to 0.95)  | 0.913<br>$\pm 0.009$              | 0.927<br>$\pm 1.058$              | 0.928<br>$\pm 202820000$          |
| Width <sup>a</sup> , $\text{\AA}^{-1}$         | 0.017<br>$\pm 0.013$              | 0.004<br>$\pm 0.817$              | 0.001<br>$\pm 20059000$           |
| Power law                                      |                                   |                                   |                                   |
| Scale, <b>C</b>                                | $9.095 \times 10^{-7}$            | $8.125 \times 10^{-7}$            | $7.955 \times 10^{-7}$            |

|                                                  |                                   |                                   |                                   |
|--------------------------------------------------|-----------------------------------|-----------------------------------|-----------------------------------|
| (> 0)                                            | $\pm 2.3 \times 10^{-9}$          | $\pm 2.2 \times 10^{-9}$          | $\pm 2.2 \times 10^{-9}$          |
| Power<br>(3 to 4)                                | 4.000<br>$\pm 6.5 \times 10^{-9}$ | 4.000<br>$\pm 6.4 \times 10^{-9}$ | 4.000<br>$\pm 6.4 \times 10^{-9}$ |
| Fractal                                          |                                   |                                   |                                   |
| Scale, <b>D</b><br>(0 to 1)                      | 0.019<br>$\pm 3.5 \times 10^{-5}$ | 0.022<br>$\pm 4.3 \times 10^{-5}$ | 0.024<br>$\pm 5.5 \times 10^{-5}$ |
| Radius, Å                                        | 14.902<br>$\pm 0.049$             | 13.905<br>$\pm 0.048$             | 12.284<br>$\pm 0.047$             |
| Fractal dimension<br>(2 to 3)                    | 2.969<br>$\pm 0.003$              | 2.931<br>$\pm 0.002$              | 2.872<br>$\pm 0.002$              |
| Correlation length, Å                            | 60.088<br>$\pm 0.181$             | 59.412<br>$\pm 0.171$             | 61.159<br>$\pm 0.180$             |
| SLD Block, $10^{-6} \text{ Å}^{-2}$<br>(Fixed)   | 0                                 | 0                                 | 0                                 |
| SLD Solvent, $10^{-6} \text{ Å}^{-2}$<br>(Fixed) | 4.1                               | 4.1                               | 4.1                               |
| Radius Polydispersity <sup>b</sup><br>(Fixed)    | 0.3                               | 0.3                               | 0.3                               |

a) One standard deviation = FWHM/2.354

b) HWHM of Lognormal distribution at the median radius divided by the median radius.

The model here is described by 2Gaussian peaks, a Power Law and a Fractal with polydispersity;  $\text{Intensity}_{2G+P+F \text{ PD}} = \text{Background} + A \cdot \text{Intensity}_{\text{Gaussian1}} + B \cdot \text{Intensity}_{\text{Gaussian2}} + C \cdot \text{Intensity}_{\text{PowerLaw}} + D \cdot \text{Intensity}_{\text{Fractal+PD}}$ . A-D here are scalar quantities that are proportional to the volume fraction of that component in the model. Only the intensity terms are functions of Q. Links to the individual models are found at the end of the ESI.

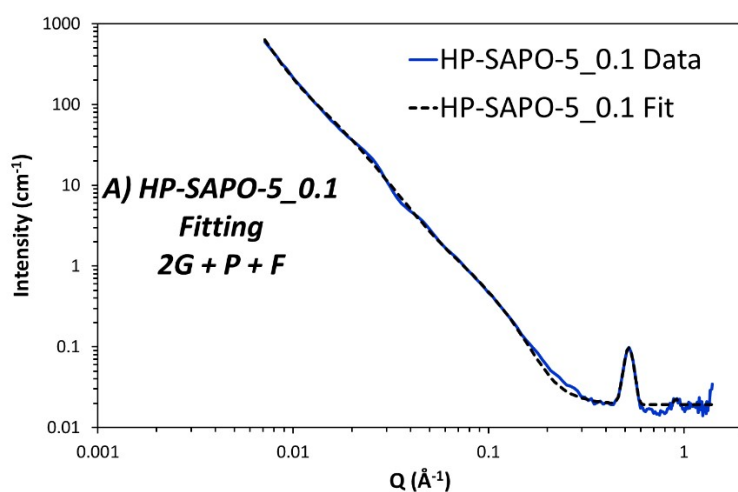

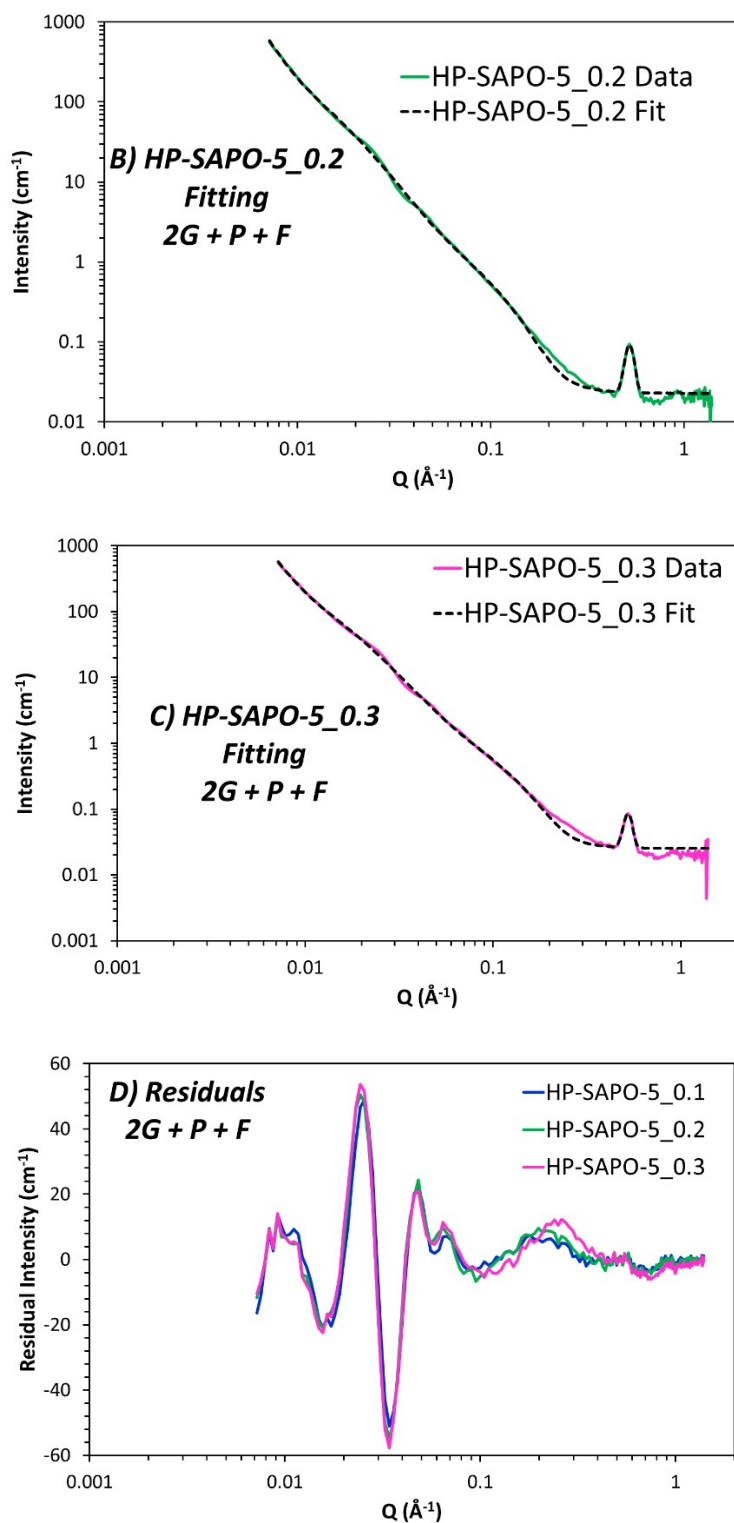

**Figure S11:** Showing SANS fits (A-C) for HP-SAPO-5\_0.1, HP-SAPO-5\_0.2 and HP-SAPO-5\_0.3 (respectively) to a model which sums 2 Gaussian peaks a Power Law and a Fractal with Polydispersity ( $2G + P + F$ ), as defined in Table S4. D) Shows the residual intensity from these models, serving as a goodness of fit.

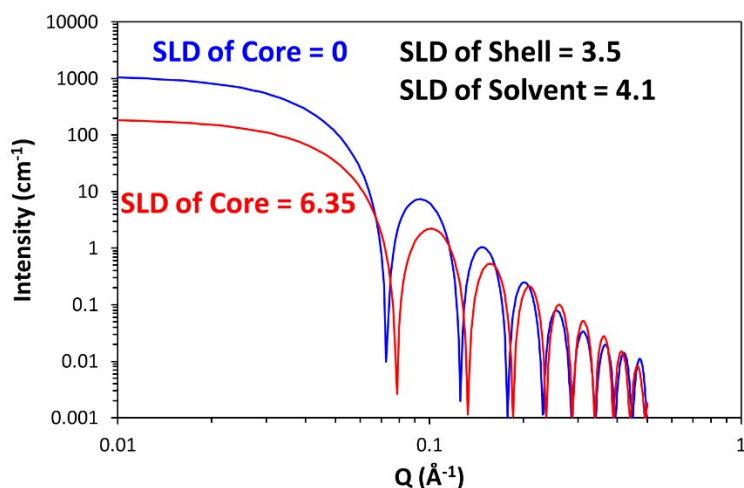

**Figure S12:** Showing the variation in local maxima with a core-shell sphere equation based on a fixed SLD of solvent and shell, but varying the core SLD (all in  $10^{-6} \text{ \AA}^{-2}$ ). Scale = 0, Background =  $0.001 \text{ cm}^{-1}$ , Radius =  $50 \text{ \AA}$ , Thickness =  $10 \text{ \AA}$ .

#### 4 Gaussians, Power Law and Fractal

**Table S5:** Fitting parameters and values, with associated uncertainties, achieved with a model including 4 Gaussians, Power Law and Fractal for the three HP-SAPO-5 systems.

| Parameter                                                          | HP-SAPO-5_0.1                  | HP-SAPO-5_0.2                  | HP-SAPO-5_0.3                                 |
|--------------------------------------------------------------------|--------------------------------|--------------------------------|-----------------------------------------------|
| Goodness of fit                                                    |                                |                                |                                               |
| Reduced $\chi^2$                                                   | 7.829                          | 10.253                         | 17.390                                        |
| General parameters                                                 |                                |                                |                                               |
| Overall Scale (Fixed)                                              | 1                              | 1                              | 1                                             |
| Background, $\text{cm}^{-1}$                                       | $0.019 \pm 1.7 \times 10^{-4}$ | $0.020 \pm 2.3 \times 10^{-4}$ | $0.024 \pm 1.6 \times 10^{-4}$                |
| 1 <sup>st</sup> Gaussian peak, Bragg peak, 100                     |                                |                                |                                               |
| Scale, A (> 0)                                                     | $0.087 \pm 0.001$              | $0.078 \pm 0.001$              | $0.067 \pm 0.001$                             |
| Position, $\text{\AA}^{-1}$ (0.50 to 0.55)                         | $0.523 \pm 2.5 \times 10^{-4}$ | $0.524 \pm 2.9 \times 10^{-4}$ | $0.524 \pm 3.2 \times 10^{-4}$                |
| Width <sup>a</sup> , $\text{\AA}^{-1}$                             | $0.024 \pm 2.9 \times 10^{-4}$ | $0.023 \pm 3.4 \times 10^{-4}$ | $0.023 \pm 3.1 \times 10^{-4}$                |
| 2 <sup>nd</sup> Gaussian peak, Bragg peak, 110                     |                                |                                |                                               |
| Scale, B (> 0)                                                     | $0.005 \pm 0.002$              | $0.004 \pm 0.002$              | $5.696 \times 10^{-5} \pm 1.4 \times 10^{-4}$ |
| Position, $\text{\AA}^{-1}$ (0.90 to 0.95)                         | $0.913 \pm 0.008$              | $0.926 \pm 0.010$              | $0.913 \pm 0.016$                             |
| Width <sup>a</sup> , $\text{\AA}^{-1}$                             | $0.020 \pm 0.011$              | $0.026 \pm 0.013$              | $0.001 \pm 1.5 \times 10^{-4}$                |
| 3 <sup>rd</sup> Gaussian peak, Hexagonal close packing diffraction |                                |                                |                                               |
| Scale, C (> 0)                                                     | $7.962 \pm 0.072$              | $9.510 \pm 0.095$              | $9.209 \pm 0.051$                             |

|                                                                    |                                                  |                                                  |                                                  |
|--------------------------------------------------------------------|--------------------------------------------------|--------------------------------------------------|--------------------------------------------------|
| Position, Å <sup>-1</sup>                                          | 0.023<br>± 5.0x10 <sup>-5</sup>                  | 0.022<br>± 5.2x10 <sup>-5</sup>                  | 0.023<br>± 3.0x10 <sup>-5</sup>                  |
| Width <sup>a</sup> , Å <sup>-1</sup>                               | 0.004<br>± 6.1x10 <sup>-5</sup>                  | 0.004<br>± 6.2x10 <sup>-5</sup>                  | 0.004<br>± 2.7x10 <sup>-5</sup>                  |
| 4 <sup>th</sup> Gaussian peak, Hexagonal close packing diffraction |                                                  |                                                  |                                                  |
| Scale, D<br>(> 0)                                                  | 0.574<br>± 0.012                                 | 0.576<br>± 0.013                                 | 0.627<br>± 0.008                                 |
| Position, Å <sup>-1</sup>                                          | 0.046<br>± 1.3x10 <sup>-4</sup>                  | 0.046<br>± 1.4x10 <sup>-4</sup>                  | 0.045<br>± 8.0x10 <sup>-5</sup>                  |
| Width <sup>a</sup> , Å <sup>-1</sup>                               | 0.004<br>± 1.7x10 <sup>-4</sup>                  | 0.004<br>± 1.8x10 <sup>-4</sup>                  | 0.005<br>± 8.4x10 <sup>-5</sup>                  |
| Power law                                                          |                                                  |                                                  |                                                  |
| Scale, E<br>(> 0)                                                  | 8.145x10 <sup>-6</sup><br>± 1.4x10 <sup>-6</sup> | 1.432x10 <sup>-4</sup><br>± 1.3x10 <sup>-5</sup> | 1.815x10 <sup>-5</sup><br>± 2.1x10 <sup>-7</sup> |
| Power<br>(3 to 4)                                                  | 3.544<br>± 0.033                                 | 3.000<br>± 0.018                                 | 3.381<br>± 0.002                                 |
| Fractal                                                            |                                                  |                                                  |                                                  |
| Scale, F<br>(0 to 1)                                               | 0.017<br>± 1.8x10 <sup>-4</sup>                  | 0.014<br>± 3.5x10 <sup>-4</sup>                  | 0.021<br>± 6.2x10 <sup>-5</sup>                  |
| Radius, Å                                                          | 14.347<br>± 0.058                                | 12.858<br>± 0.062                                | 11.499<br>± 0.045                                |
| Fractal dimension<br>(2 to 3)                                      | 2.619<br>± 0.010                                 | 2.325<br>± 0.021                                 | 2.524<br>± 0.003                                 |
| Correlation length, Å                                              | 110.88<br>± 2.36                                 | 130.10<br>± 9.73                                 | 98.81<br>± 0.67                                  |
| SLD Block, 10 <sup>-6</sup> Å <sup>-2</sup><br>(Fixed)             | 0                                                | 0                                                | 0                                                |
| SLD Solvent, 10 <sup>-6</sup> Å <sup>-2</sup><br>(Fixed)           | 4.1                                              | 4.1                                              | 4.1                                              |
| Radius Polydispersity <sup>b</sup><br>(Fixed)                      | 0.3                                              | 0.3                                              | 0.3                                              |

a) One standard deviation = FWHM/2.354

b) HWHM of Lognormal distribution at the median radius divided by the median radius.

The model here is described by 4Gaussian peaks, a Power Law and a Fractal with polydispersity;  
Intensity<sub>4G+P+F PD</sub> = Background + A.Intensity<sub>Gaussian1</sub> + B.Intensity<sub>Gaussian2</sub> + C.Intensity<sub>Gaussian3</sub> +  
D.Intensity<sub>Gaussian4</sub> + E.Intensity<sub>PowerLaw</sub> + F.Intensity<sub>Fractal+PD</sub>. A-F here are scalar quantities that are  
proportional to the volume fraction of that component in the model. Only the intensity terms are  
functions of Q. Links to the individual models are found at the end of the ESI.

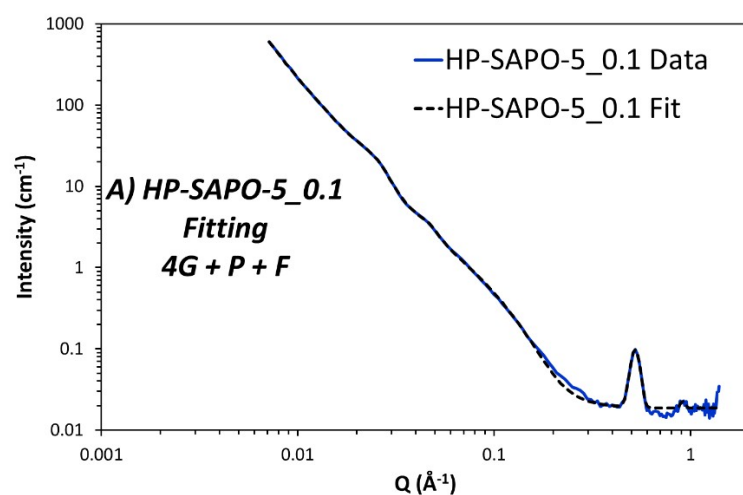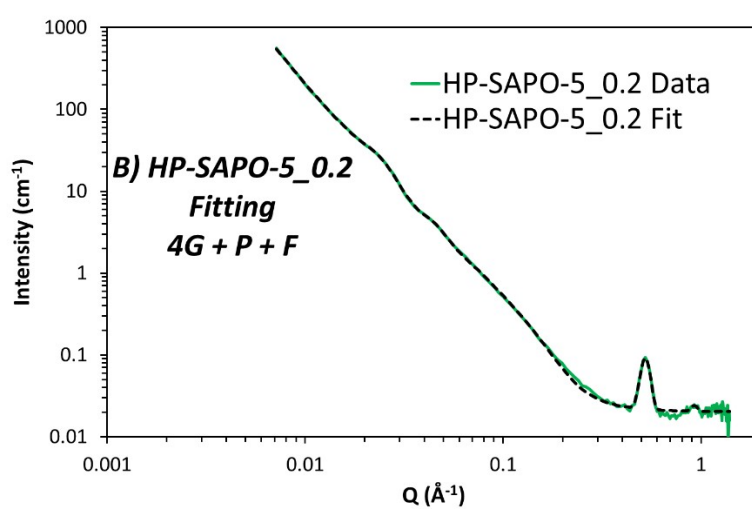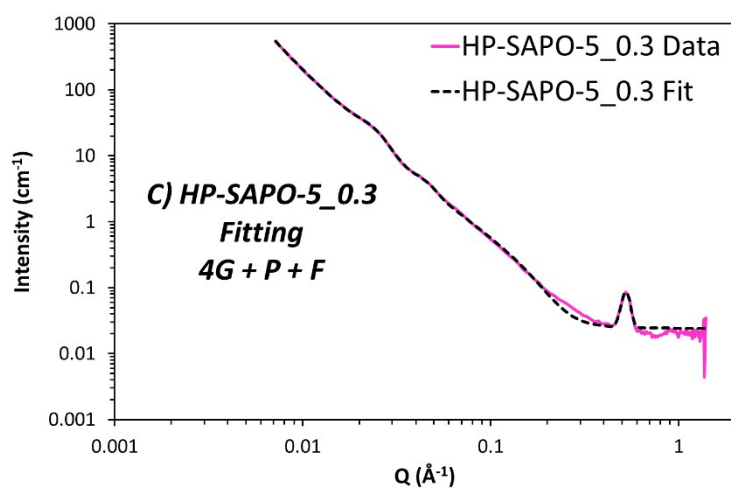

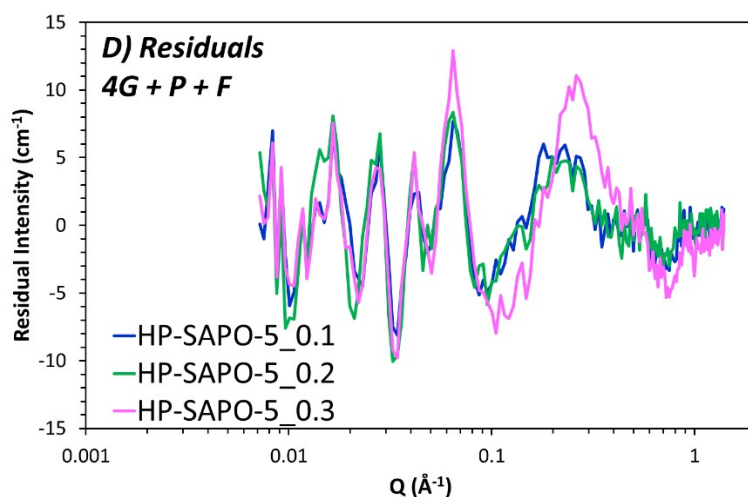

**Figure S13:** Showing SANS fits (A-C) for HP-SAPO-5\_0.1, HP-SAPO-5\_0.2 and HP-SAPO-5\_0.3 (respectively) to a model which sums 4 Gaussian peaks a Power Law and a Fractal with Polydispersity (4G + P + F), as defined in Table S5. D) Shows the residual intensity from these models, serving as a goodness of fit.

#### 4 Gaussians, Power Law, Fractal and Sphere

**Table S6:** Fitting parameters and values, with associated uncertainties, achieved with a model including 4 Gaussians, Power Law, Fractal and a Sphere for the three HP-SAPO-5 systems.

| Parameter                                                          | HP-SAPO-5_0.1                     | HP-SAPO-5_0.2                     | HP-SAPO-5_0.3                     |
|--------------------------------------------------------------------|-----------------------------------|-----------------------------------|-----------------------------------|
| Goodness of fit                                                    |                                   |                                   |                                   |
| Reduced $\chi^2$                                                   | 3.435                             | 5.035                             | 5.660                             |
| General parameters                                                 |                                   |                                   |                                   |
| Overall Scale (Fixed)                                              | 1                                 | 1                                 | 1                                 |
| Background, cm <sup>-1</sup>                                       | 0.017<br>$\pm 1.4 \times 10^{-4}$ | 0.020<br>$\pm 1.5 \times 10^{-4}$ | 0.021<br>$\pm 4.4 \times 10^{-6}$ |
| 1 <sup>st</sup> Gaussian peak, Bragg peak, 100                     |                                   |                                   |                                   |
| Scale, A (> 0)                                                     | 0.087<br>$\pm 0.001$              | 0.078<br>$\pm 0.001$              | 0.069<br>$\pm 0.001$              |
| Position, Å <sup>-1</sup> (0.50 to 0.55)                           | 0.523<br>$\pm 2.5 \times 10^{-4}$ | 0.524<br>$\pm 3.0 \times 10^{-4}$ | 0.524<br>$\pm 3.2 \times 10^{-4}$ |
| Width <sup>a</sup> , Å <sup>-1</sup>                               | 0.024<br>$\pm 2.2 \times 10^{-4}$ | 0.023<br>$\pm 3.5 \times 10^{-4}$ | 0.025<br>$\pm 3.5 \times 10^{-4}$ |
| 2 <sup>nd</sup> Gaussian peak, Bragg peak, 110                     |                                   |                                   |                                   |
| Scale, B (> 0)                                                     | 0.006<br>$\pm 0.001$              | 0.004<br>$\pm 0.002$              | 0.312<br>$\pm \text{nan}$         |
| Position, Å <sup>-1</sup> (0.90 to 0.95)                           | 0.914<br>$\pm 0.007$              | 0.925<br>$\pm 0.010$              | 0.934<br>$\pm \text{nan}$         |
| Width <sup>a</sup> , Å <sup>-1</sup>                               | 0.027<br>$\pm 0.002$              | 0.027<br>$\pm 0.013$              | 0.001<br>$\pm \text{nan}$         |
| 3 <sup>rd</sup> Gaussian peak, Hexagonal close packing diffraction |                                   |                                   |                                   |



|                                                                    |                                                    |                                                    |                                                    |
|--------------------------------------------------------------------|----------------------------------------------------|----------------------------------------------------|----------------------------------------------------|
| Scale, <b>C</b><br>(> 0)                                           | 8.095<br>$\pm 0.035$                               | 8.997<br>$\pm 0.145$                               | 9.252<br>$\pm 0.115$                               |
| Position, $\text{\AA}^{-1}$                                        | 0.023<br>$\pm 2.7 \times 10^{-5}$                  | 0.023<br>$\pm 5.8 \times 10^{-5}$                  | 0.023<br>$\pm 5.2 \times 10^{-5}$                  |
| Width <sup>a</sup> , $\text{\AA}^{-1}$                             | 0.004<br>$\pm 2.5 \times 10^{-5}$                  | 0.004<br>$\pm 8.1 \times 10^{-5}$                  | 0.004<br>$\pm 7.0 \times 10^{-5}$                  |
| 4 <sup>th</sup> Gaussian peak, Hexagonal close packing diffraction |                                                    |                                                    |                                                    |
| Scale, <b>D</b><br>(> 0)                                           | 0.634<br>$\pm 0.008$                               | 0.695<br>$\pm 0.020$                               | 0.695<br>$\pm 0.017$                               |
| Position, $\text{\AA}^{-1}$                                        | 0.045<br>$\pm 8.1 \times 10^{-5}$                  | 0.044<br>$\pm 2.3 \times 10^{-4}$                  | 0.044<br>$\pm 1.8 \times 10^{-4}$                  |
| Width <sup>a</sup> , $\text{\AA}^{-1}$                             | 0.005<br>$\pm 6.7 \times 10^{-5}$                  | 0.004<br>$\pm 2.2 \times 10^{-4}$                  | 0.005<br>$\pm 2.0 \times 10^{-4}$                  |
| Power law                                                          |                                                    |                                                    |                                                    |
| Scale, <b>E</b><br>(> 0)                                           | $1.913 \times 10^{-6}$<br>$\pm 9.1 \times 10^{-9}$ | $2.602 \times 10^{-6}$<br>$\pm 7.6 \times 10^{-7}$ | $9.258 \times 10^{-6}$<br>$\pm 2.0 \times 10^{-6}$ |
| Power<br>(3 to 4)                                                  | 3.823<br>$\pm 0.001$                               | 3.754<br>$\pm 0.054$                               | 3.511<br>$\pm 0.040$                               |
| Fractal                                                            |                                                    |                                                    |                                                    |
| Scale, <b>F</b><br>(0 to 1)                                        | 0.015<br>$\pm 4.0 \times 10^{-5}$                  | 0.015<br>$\pm 1.7 \times 10^{-4}$                  | 0.016<br>$\pm 2.0 \times 10^{-4}$                  |
| Radius, $\text{\AA}$                                               | 18.054<br>$\pm 0.058$                              | 18.696<br>$\pm 0.155$                              | 15.761<br>$\pm 0.115$                              |
| Fractal dimension<br>(2 to 3)                                      | 2.805<br>$\pm 0.002$                               | 2.815<br>$\pm 0.011$                               | 2.675<br>$\pm 0.012$                               |
| Correlation length, $\text{\AA}$                                   | 94.79<br>$\pm 0.34$                                | 84.55<br>$\pm 2.27$                                | 88.78<br>$\pm 2.29$                                |
| SLD Block, $10^{-6} \text{\AA}^{-2}$<br>(Fixed)                    | 0                                                  | 0                                                  | 0                                                  |
| SLD Solvent, $10^{-6} \text{\AA}^{-2}$<br>(Fixed)                  | 4.1                                                | 4.1                                                | 4.1                                                |
| Radius Polydispersity <sup>b</sup><br>(Fixed)                      | 0.3                                                | 0.3                                                | 0.3                                                |
| Sphere <sup>c</sup>                                                |                                                    |                                                    |                                                    |
| Scale, <b>G</b><br>(> 0)                                           | 0.008<br>$\pm 1.0 \times 10^{-4}$                  | 0.013<br>$\pm 2.3 \times 10^{-4}$                  | 0.019<br>$\pm 2.9 \times 10^{-4}$                  |
| SLD, $10^{-6} \text{\AA}^{-2}$<br>(Fixed)                          | 0                                                  | 0                                                  | 0                                                  |
| SLD Solvent, $10^{-6} \text{\AA}^{-2}$<br>(Fixed)                  | 4.1                                                | 4.1                                                | 4.1                                                |
| Radius, $\text{\AA}$                                               | 12.351<br>$\pm 0.070$                              | 12.116<br>$\pm 0.118$                              | 8.785<br>$\pm 0.087$                               |

a) One standard deviation = FWHM/2.354

b) HWHM of Lognormal distribution at the median radius divided by the median radius

c) Polydispersity was not used for the radius of the sphere.

The model here is described by 4Gaussian peaks, a Power Law, a Fractal with polydispersity and a sphere;  $\text{Intensity}_{4G+P+F+S \text{ PD}} = \text{Background} + A.\text{Intensity}_{\text{Gaussian1}} + B.\text{Intensity}_{\text{Gaussian2}} + C.\text{Intensity}_{\text{Gaussian3}} + D.\text{Intensity}_{\text{Gaussian4}} + E.\text{Intensity}_{\text{PowerLaw}} + F.\text{Intensity}_{\text{Fractal+PD}} + G.\text{Intensity}_{\text{Sphere}}$ . A-G here are scalar

quantities that are proportional to the volume fraction of that component in the model. Only the intensity terms are functions of  $Q$ . Links to the individual models are found at the end of the ESI.

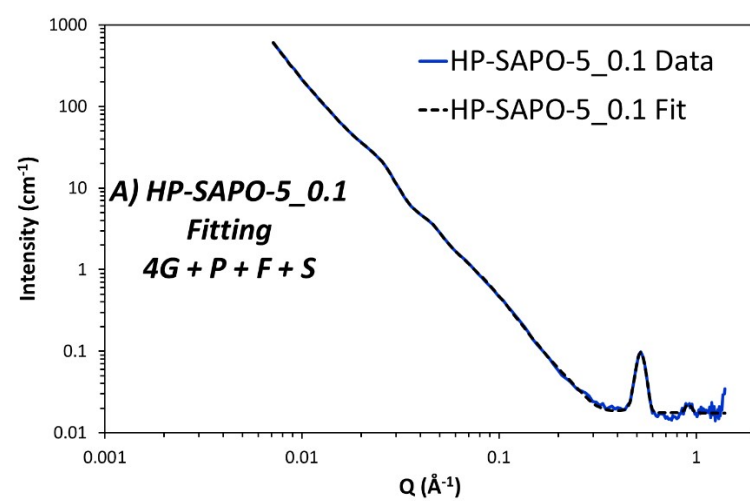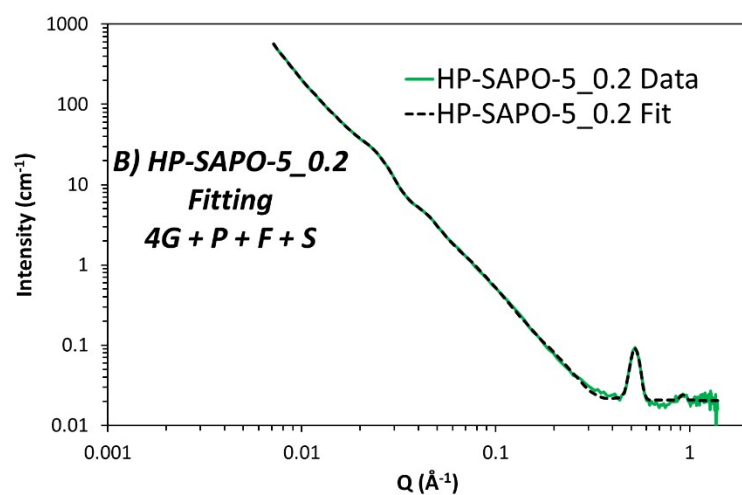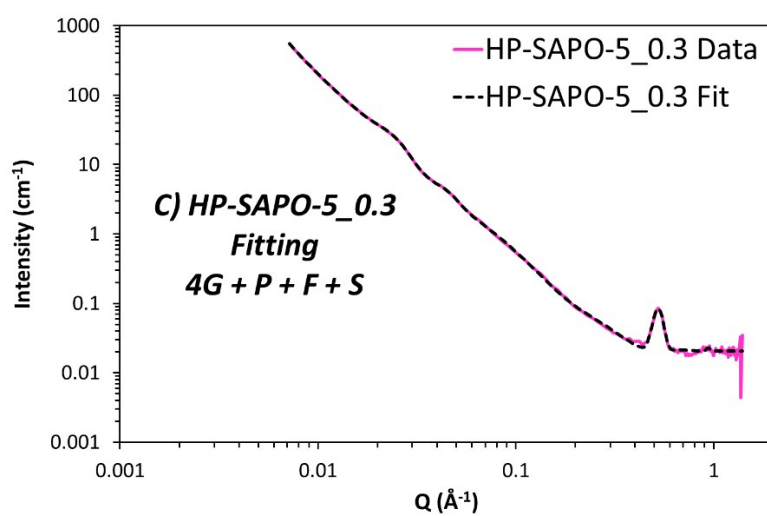

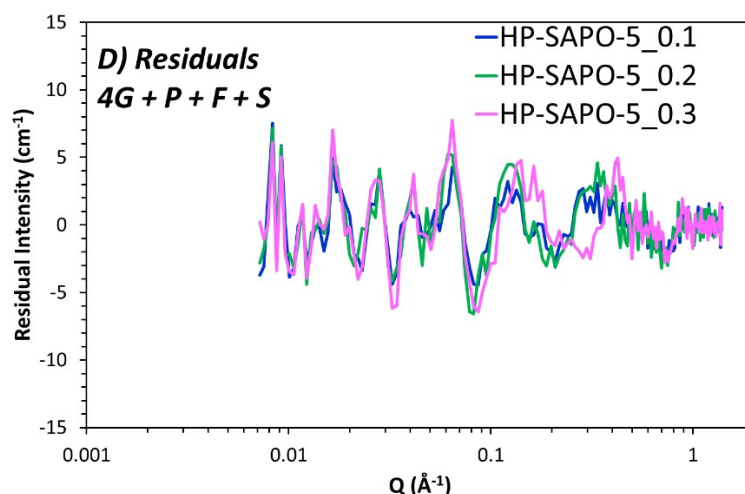

**Figure S14:** Showing SANS fits (A-C) for HP-SAPO-5\_0.1, HP-SAPO-5\_0.2 and HP-SAPO-5\_0.3 (respectively) to a model which sums 4 Gaussian peaks a Power Law and a Fractal with Polydispersity and a Sphere (4G + P + F + S), as defined in Table S6. D) Shows the residual intensity from these models, serving as a goodness of fit.

#### 4 Gaussians, Power Law, Fractal and Core-Shell Sphere

**Table S7:** Fitting parameters and values, with associated uncertainties, achieved with a model including 4 Gaussians, Power Law, Fractal and a Core-Shell Sphere for the three HP-SAPO-5 systems.

| Parameter                                                          | HP-SAPO-5_0.1                     | HP-SAPO-5_0.2                      | HP-SAPO-5_0.3                     |
|--------------------------------------------------------------------|-----------------------------------|------------------------------------|-----------------------------------|
| Goodness of fit                                                    |                                   |                                    |                                   |
| Reduced $\chi^2$                                                   | 3.141                             | 4.778                              | 4.896                             |
| General parameters                                                 |                                   |                                    |                                   |
| Overall Scale (Fixed)                                              | 1                                 | 1                                  | 1                                 |
| Background, $\text{cm}^{-1}$                                       | 0.017<br>$\pm 1.5 \times 10^{-4}$ | 0.020<br>$\pm 2.1 \times 10^{-4}$  | 0.021<br>$\pm 1.3 \times 10^{-4}$ |
| 1 <sup>st</sup> Gaussian peak, Bragg peak, 100                     |                                   |                                    |                                   |
| Scale, <b>A</b> ( $> 0$ )                                          | 0.088<br>$\pm 0.007$              | 0.078<br>$\pm 0.001$               | 0.069<br>$\pm 0.001$              |
| Position, $\text{\AA}^{-1}$ (0.50 to 0.55)                         | 0.523<br>$\pm 2.6 \times 10^{-4}$ | 0.523<br>$\pm 2.9 \times 10^{-4}$  | 0.524<br>$\pm 3.1 \times 10^{-4}$ |
| Width <sup>a</sup> , $\text{\AA}^{-1}$                             | 0.024<br>$\pm 2.2 \times 10^{-4}$ | 0.0238<br>$\pm 3.5 \times 10^{-4}$ | 0.026<br>$\pm 2.9 \times 10^{-4}$ |
| 2 <sup>nd</sup> Gaussian peak, Bragg peak, 110                     |                                   |                                    |                                   |
| Scale, <b>B</b> ( $> 0$ )                                          | 0.007<br>$\pm 0.001$              | 0.004<br>$\pm 0.001$               | 0.002<br>$\pm 2.8 \times 10^{-4}$ |
| Position, $\text{\AA}^{-1}$ (0.90 to 0.95)                         | 0.918<br>$\pm 0.006$              | 0.925<br>$\pm 0.010$               | 0.909<br>$\pm 0.010$              |
| Width <sup>a</sup> , $\text{\AA}^{-1}$                             | 0.025<br>$\pm 0.002$              | 0.030<br>$\pm 0.011$               | 0.018<br>$\pm 0.001$              |
| 3 <sup>rd</sup> Gaussian peak, Hexagonal close packing diffraction |                                   |                                    |                                   |

|                                                                    |                                                    |                                                    |                                                    |
|--------------------------------------------------------------------|----------------------------------------------------|----------------------------------------------------|----------------------------------------------------|
| Scale, <b>C</b><br>(> 0)                                           | 8.337<br>$\pm 0.045$                               | 9.280<br>$\pm 0.105$                               | 9.483<br>$\pm 0.039$                               |
| Position, $\text{\AA}^{-1}$                                        | 0.023<br>$\pm 3.3 \times 10^{-5}$                  | 0.023<br>$\pm 5.4 \times 10^{-5}$                  | 0.023<br>$\pm 2.5 \times 10^{-5}$                  |
| Width <sup>a</sup> , $\text{\AA}^{-1}$                             | 0.004<br>$\pm 3.2 \times 10^{-5}$                  | 0.004<br>$\pm 6.4 \times 10^{-5}$                  | 0.004<br>$\pm 2.3 \times 10^{-5}$                  |
| 4 <sup>th</sup> Gaussian peak, Hexagonal close packing diffraction |                                                    |                                                    |                                                    |
| Scale, <b>D</b><br>(> 0)                                           | 0.631<br>$\pm 0.008$                               | 0.654<br>$\pm 0.015$                               | 0.699<br>$\pm 0.010$                               |
| Position, $\text{\AA}^{-1}$                                        | 0.045<br>$\pm 8.3 \times 10^{-5}$                  | 0.044<br>$\pm 1.4 \times 10^{-4}$                  | 0.044<br>$\pm 8.1 \times 10^{-5}$                  |
| Width <sup>a</sup> , $\text{\AA}^{-1}$                             | 0.005<br>$\pm 7.6 \times 10^{-5}$                  | 0.005<br>$\pm 1.7 \times 10^{-4}$                  | 0.005<br>$\pm 6.7 \times 10^{-5}$                  |
| Power law                                                          |                                                    |                                                    |                                                    |
| Scale, <b>E</b><br>(> 0)                                           | $7.212 \times 10^{-7}$<br>$\pm 3.1 \times 10^{-9}$ | $6.608 \times 10^{-7}$<br>$\pm 7.4 \times 10^{-9}$ | $1.009 \times 10^{-6}$<br>$\pm 5.4 \times 10^{-9}$ |
| Power<br>(3 to 4)                                                  | 4.000<br>$\pm 0.001$                               | 4.000<br>$\pm 6.2 \times 10^{-9}$                  | 3.918<br>$\pm 0.001$                               |
| Fractal                                                            |                                                    |                                                    |                                                    |
| Scale, <b>F</b><br>(0 to 1)                                        | 0.017<br>$\pm 5.3 \times 10^{-5}$                  | 0.020<br>$\pm 1.6 \times 10^{-4}$                  | 0.023<br>$\pm 9.5 \times 10^{-5}$                  |
| Radius, $\text{\AA}$                                               | 11.263<br>$\pm 0.045$                              | 10.031<br>$\pm 0.117$                              | 7.425<br>$\pm 0.041$                               |
| Fractal dimension<br>(2 to 3)                                      | 2.815<br>$\pm 0.002$                               | 2.740<br>$\pm 0.007$                               | 2.679<br>$\pm 0.002$                               |
| Correlation length, $\text{\AA}$                                   | 102.07<br>$\pm 0.35$                               | 102.09<br>$\pm 1.82$                               | 103.79<br>$\pm 0.32$                               |
| SLD Block, $10^{-6} \text{\AA}^{-2}$<br>(Fixed)                    | 0                                                  | 0                                                  | 0                                                  |
| SLD Solvent, $10^{-6} \text{\AA}^{-2}$<br>(Fixed)                  | 4.1                                                | 4.1                                                | 4.1                                                |
| Radius Polydispersity <sup>b</sup><br>(Fixed)                      | 0.3                                                | 0.3                                                | 0.3                                                |
| Core-Shell Sphere <sup>c</sup>                                     |                                                    |                                                    |                                                    |
| Scale, <b>G</b><br>(> 0)                                           | 0.031<br>$\pm 2.3 \times 10^{-4}$                  | 0.036<br>$\pm 0.004$                               | 0.039<br>$\pm 3.9 \times 10^{-4}$                  |
| Radius, $\text{\AA}$                                               | 23.472<br>$\pm 0.069$                              | 22.596<br>$\pm 0.715$                              | 20.057<br>$\pm 0.073$                              |
| Shell Thickness, $\text{\AA}$                                      | 20.061<br>$\pm 0.109$                              | 20.658<br>$\pm 0.531$                              | 17.306<br>$\pm 0.085$                              |
| SLD Core, $10^{-6} \text{\AA}^{-2}$<br>(Fixed)                     | 0                                                  | 0                                                  | 0                                                  |
| SLD Shell, $10^{-6} \text{\AA}^{-2}$<br>(Fixed)                    | 3.5                                                | 3.5                                                | 3.5                                                |
| SLD Solvent, $10^{-6} \text{\AA}^{-2}$<br>(Fixed)                  | 4.1                                                | 4.1                                                | 4.1                                                |

a) One standard deviation = FWHM/2.354

b) HWHM of Lognormal distribution at the median radius divided by the median radius

c) Polydispersity was not used for either the radius or the thickness for the Core-Shell Sphere equation.

The model here is described by 4Gaussian peaks, a Power Law, a Fractal with polydispersity and a Core-shell sphere;  $\text{Intensity}_{4G+P+F+CSS} = \text{Background} + A \cdot \text{Intensity}_{\text{Gaussian1}} + B \cdot \text{Intensity}_{\text{Gaussian2}} + C \cdot \text{Intensity}_{\text{Gaussian3}} + D \cdot \text{Intensity}_{\text{Gaussian4}} + E \cdot \text{Intensity}_{\text{PowerLaw}} + F \cdot \text{Intensity}_{\text{Fractal+PD}} + G \cdot \text{Intensity}_{\text{CoreShellSphere}}$ . A-G here are scalar quantities that are proportional to the volume fraction of that component in the model. Only the intensity terms are functions of Q. Links to the individual models are found at the end of the ESI.

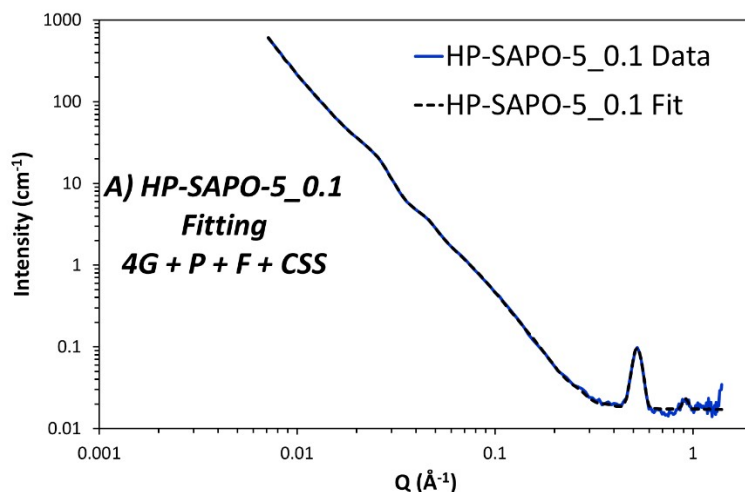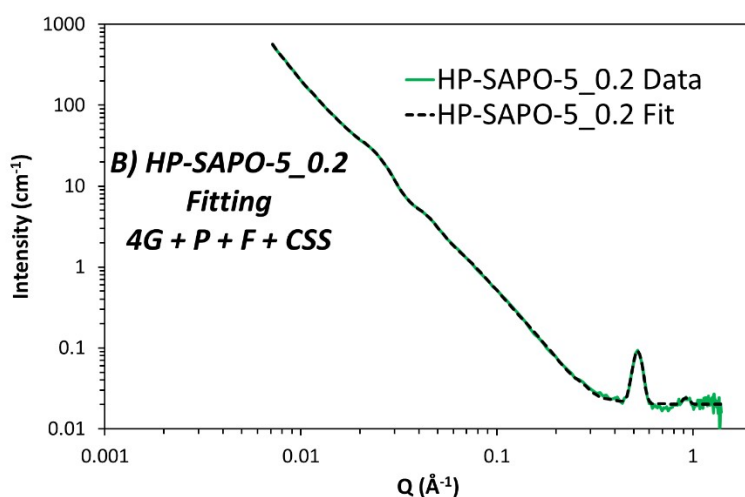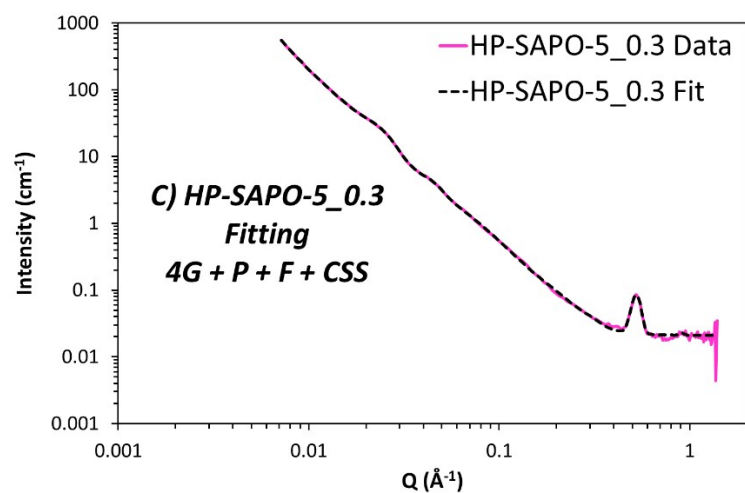

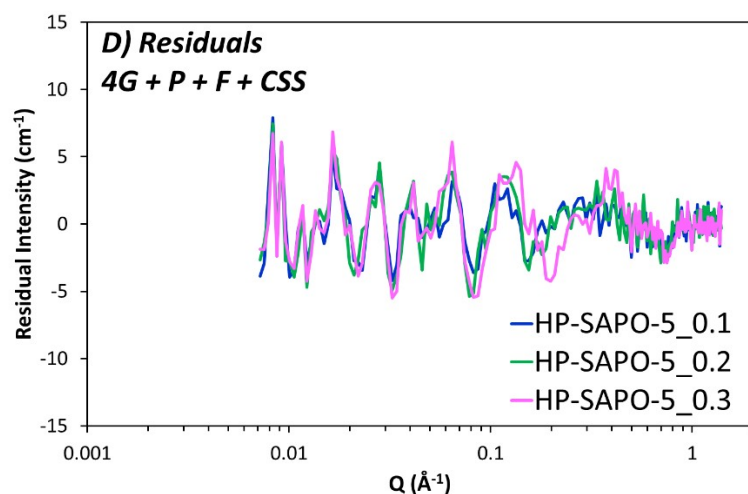

**Figure S15:** Showing SANS fits (A-C) for HP-SAPO-5\_0.1, HP-SAPO-5\_0.2 and HP-SAPO-5\_0.3 (respectively) to a model which sums 4 Gaussian peaks a Power Law and a Fractal with Polydispersity and a Core-shell Sphere (4G + P + F + CSS), as defined in Table S7. D) Shows the residual intensity from these models, serving as a goodness of fit.

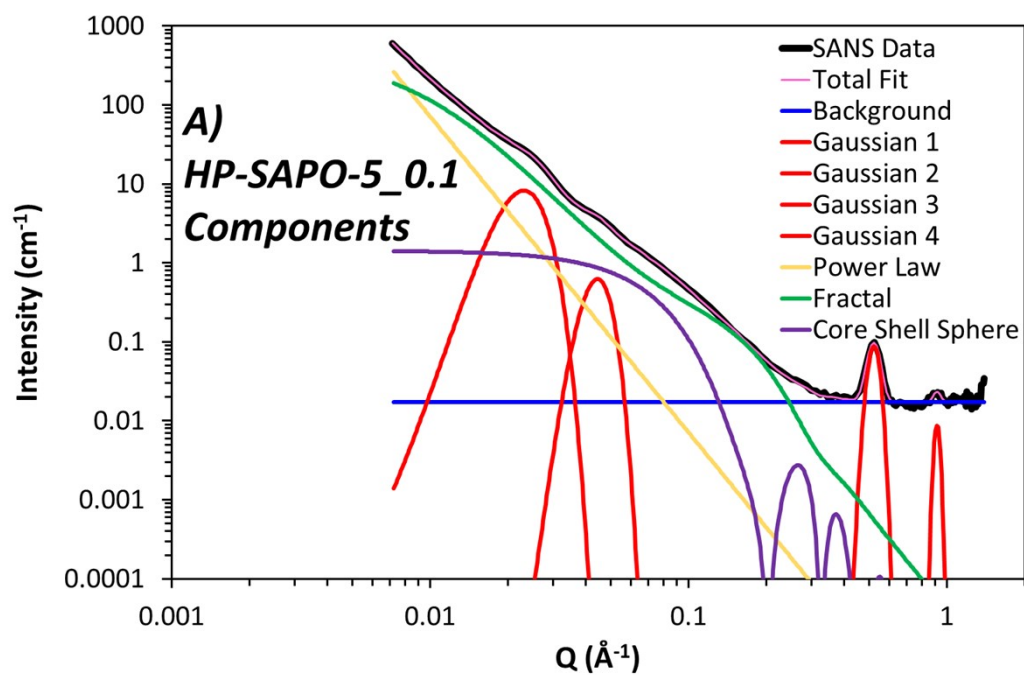

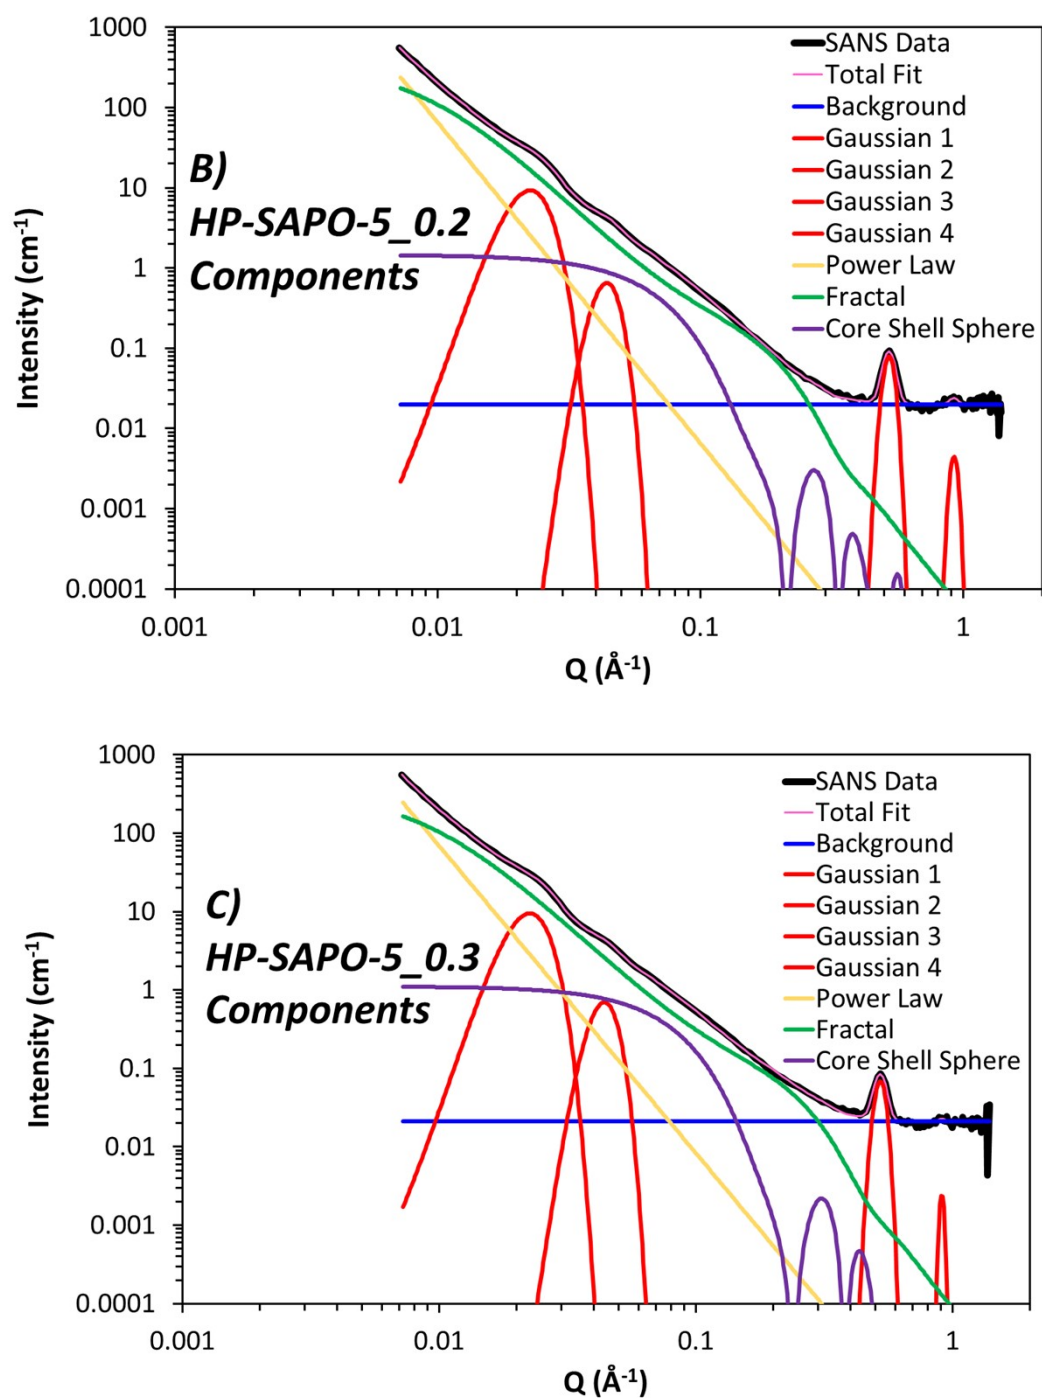

**Figure S16:** Showing the contribution from each component for the 4 Gaussian, Power Law, Fractal and Core-Shell Sphere fitted model for A) HP-SAPO-5\_0.1, B) HP-SAPO-5\_0.2 and C) HP-SAPO-5\_0.3, for the SANS fit outlined in Table S7.

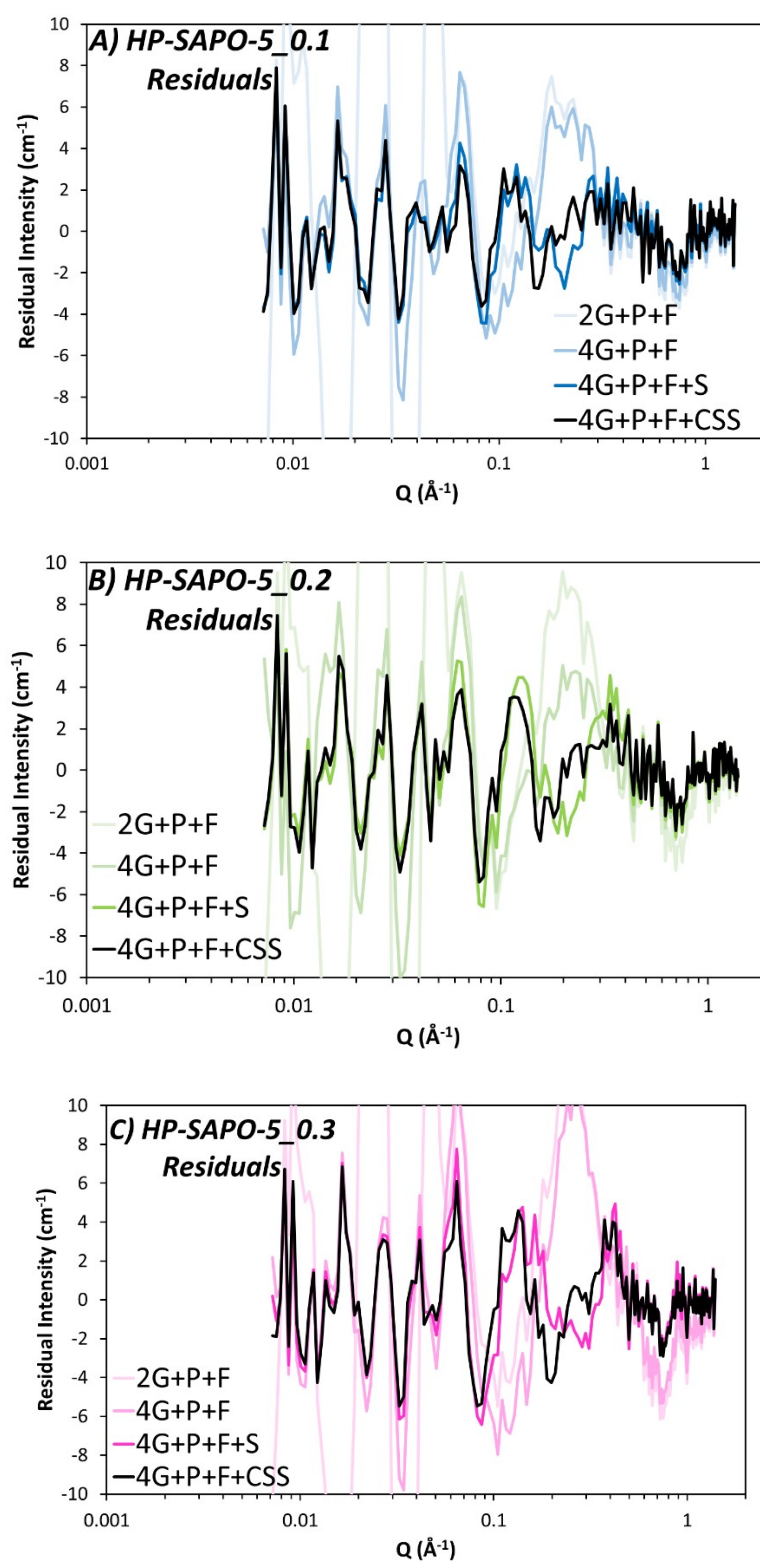

**Figure S17:** Comparing the residuals for A) HP-SAPO-5\_0.1, B) HP-SAPO-5\_0.2 and C) HP-SAPO-5\_0.3, for a variety of SANS fits outlined in Tables S4 to S7.



### **Descriptions of Model Terms**

|                    |                                                                                                                                             |
|--------------------|---------------------------------------------------------------------------------------------------------------------------------------------|
| Gaussian Peak:     | <a href="http://www.sasview.org/docs/user/models/gaussian_peak.html">http://www.sasview.org/docs/user/models/gaussian_peak.html</a>         |
| Power Law:         | <a href="http://www.sasview.org/docs/user/models/power_law.html">http://www.sasview.org/docs/user/models/power_law.html</a>                 |
| Fractal:           | <a href="http://www.sasview.org/docs/user/models/fractal.html">http://www.sasview.org/docs/user/models/fractal.html</a>                     |
| Sphere:            | <a href="http://www.sasview.org/docs/user/models/sphere.html">http://www.sasview.org/docs/user/models/sphere.html</a>                       |
| Core-Shell Sphere: | <a href="http://www.sasview.org/docs/user/models/core_shell_sphere.html">http://www.sasview.org/docs/user/models/core_shell_sphere.html</a> |
